# Supplementary material for: A Voluntary Statewide Newborn Screening Pilot for Spinal Muscular Atrophy: Results from Early Check
Source: MDPI journal article supplement (doi:10.3390/ijns7010020), 2021-03-21
Supplement: s1 [file s1]

## Supplementary Materials

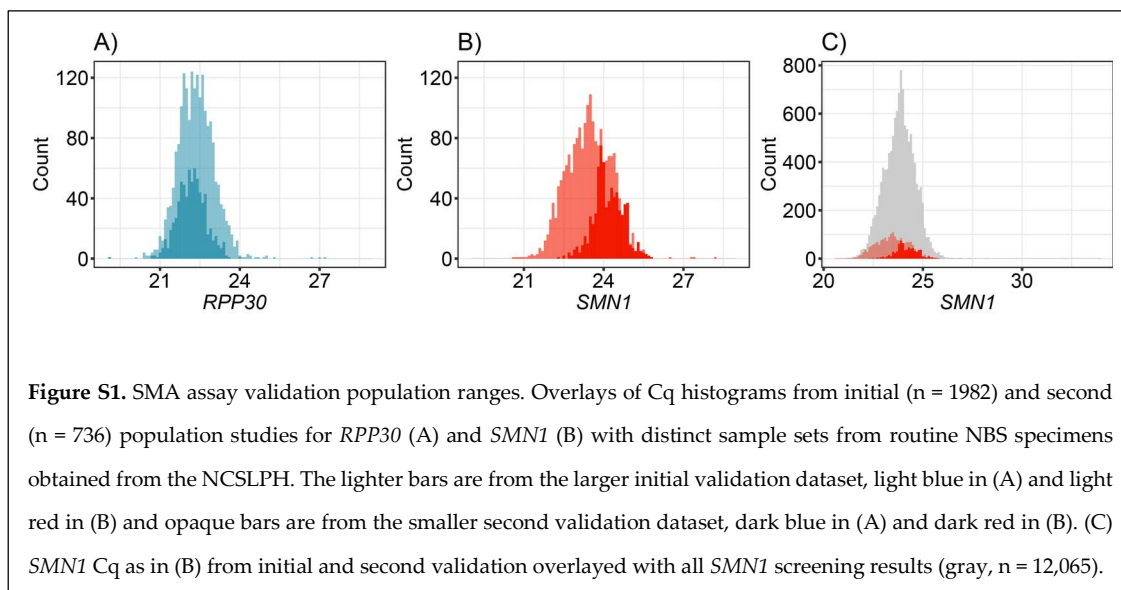

**Table S1.** Total Precision.

| Initial Validation   |           |      |      |            |      |      |
|----------------------|-----------|------|------|------------|------|------|
| Quality Control Type | SMN1 (Cq) |      |      | RPP30 (Cq) |      |      |
|                      | Mean      | SD   | %CV  | Mean       | SD   | %CV  |
| Normal               | 25.48     | 1.18 | 4.63 | 23.84      | 0.79 | 3.33 |
| SMA patient (PT7)    | No Cq     | -    | -    | 21.14      | 0.69 | 3.29 |
| SMA Carrier (Car8)   | 24.64     | 0.75 | 3.05 | 22.37      | 0.8  | 3.58 |
| Second Validation    |           |      |      |            |      |      |
| Quality Control Type | SMN1 (Cq) |      |      | RPP30 (Cq) |      |      |
|                      | Mean      | SD   | %CV  | Mean       | SD   | %CV  |
| Normal               | 25.62     | 0.42 | 1.65 | 23.16      | 0.4  | 1.65 |
| SMA patient (PT7)    | No Cq     | -    | -    | 21.29      | 0.56 | 2.64 |
| SMA Carrier (Car8)   | 24.83     | 0.53 | 2.15 | 22.23      | 0.46 | 2.07 |

**Table S2.** Reference Range.

| Validation | n    | SMNI (Cq) |      |       |       |       | RPP30 (Cq) |      |       |       |       |
|------------|------|-----------|------|-------|-------|-------|------------|------|-------|-------|-------|
|            |      | Mean      | SD   | Min   | Max   | 99.9% | Mean       | SD   | Min   | Max   | 99.9% |
| Initial    | 1982 | 23.44     | 0.84 | 20.64 | 28.16 | 27.31 | 22.36      | 0.68 | 20.15 | 27.25 | 26.73 |
| Second     | 736  | 24.17     | 0.56 | 22.33 | 25.81 | 25.74 | 22.19      | 0.54 | 19.14 | 24.05 | 23.71 |

**Table S3.** Factors affecting time to testing and reporting for babies screened for SMA by EC. (n = 12,065)

| Age at sample collection                 | % total |
|------------------------------------------|---------|
| ≤1 day post birth                        | 0.8     |
| 1 day post birth                         | 70.3    |
| 2 days post birth                        | 25.2    |
| >2 days post birth                       | 3.7     |
| DBS received by the state laboratory     |         |
| <3 days post birth                       | 16.8    |
| 3 days post birth                        | 38.4    |
| 4 days post birth                        | 23.7    |
| 5 days post birth                        | 12.7    |
| >5 days post birth                       | 8.4     |
| Results reported by the state laboratory |         |
| <4 days post birth                       | 8.1     |
| 4 days post birth                        | 21.1    |
| 5 days post birth                        | 23.5    |
| 6 days post birth                        | 25.5    |
| 7 days post birth                        | 13.2    |
| >7 days post birth                       | 8.5     |
